# Supplementary material for: Student Experiences and Changing Science Interest When Transitioning from K-12 to College
Source: MDPI journal article supplement (doi:10.3390/educsci12070496), 2022-07-19
Supplement: s1 [file s1]

Archive with 1 entries (1 files):
- education-1817565-supplementary.pdf
